# Supplementary material
Source: PubMed Central journal article supplement (PMC9340027)
Supplement: tobaccocontrol-2021-056582supp001.pdf [file tobaccocontrol-2021-056582supp001.pdf]

**Supplementary Table S1. Flavor Chemicals ( $\mu\text{g/mL}$ ) Below the Limit of Quantification**

| Compound Name           | JUUL™ Pods               |                     |                                |                        | Puff                       |                               |
|-------------------------|--------------------------|---------------------|--------------------------------|------------------------|----------------------------|-------------------------------|
|                         | “Cool Mint” <sup>a</sup> | “Mint” <sup>b</sup> | “Classic Menthol” <sup>c</sup> | “Menthol” <sup>d</sup> | Bar “Menthol” <sup>e</sup> | Plus “Cool Mint” <sup>f</sup> |
| $\beta$ -Caryophyllene  | -                        | 4.7                 | 3.7                            | -                      | -                          | 18.23                         |
| Limonene                | 2.4                      | 2.8                 | -                              | -                      | 2.83                       | 16.93                         |
| Methyl Anthranilate     | -                        | -                   | -                              | -                      | -                          | 14.65                         |
| trans-Geraniol          | -                        | -                   | -                              | -                      | -                          | 13.25                         |
| Ethyl lactate           | -                        | -                   | -                              | -                      | 12.9                       | -                             |
| Caffeine                | -                        | -                   | 12.7                           | 11.3                   | -                          | -                             |
| Hydroxyacetone          | -                        | -                   | -                              | -                      | 10.27                      | 8.17                          |
| $\beta$ -Damascone      | -                        | -                   | -                              | 10                     | -                          | -                             |
| (E)- $\beta$ -Ionone    | -                        | -                   | -                              | -                      | 2                          | 10.2                          |
| Ethyl Vanillin          | -                        | -                   | -                              | -                      | 9.73                       | -                             |
| Ethyl Maltol            | -                        | -                   | 8.3                            | 7.7                    | -                          | -                             |
| cis-Linalool oxide      | -                        | -                   | -                              | -                      | -                          | 7                             |
| Methyl salicylate       | -                        | 0.6                 | -                              | -                      | 6.5                        | -                             |
| Ethyl Propanoate        | -                        | -                   | -                              | -                      | -                          | 6.55                          |
| Ethyl butanoate         | 1                        | -                   | -                              | -                      | 3.67                       | 6.35                          |
| 1-Hexanol               | -                        | -                   | -                              | -                      | 6.03                       | 1.4                           |
| $\beta$ -Pinene         | 0.8                      | 1.6                 | -                              | -                      | 1.67                       | 5.73                          |
| Eugenol                 | -                        | -                   | -                              | -                      | -                          | 5.25                          |
| (3Z)-3-Hexen-1-ol       | 5                        | 5                   | -                              | -                      | -                          | -                             |
| Vanillin                | 4.9                      | -                   | 2.5                            | -                      | -                          | -                             |
| Benzyl acetate          | -                        | -                   | -                              | -                      | -                          | 4.85                          |
| Estragole               | -                        | -                   | -                              | -                      | -                          | 4.8                           |
| Acetylpyrazine          | -                        | -                   | -                              | 4.8                    | 1.57                       | 4.6                           |
| $\alpha$ -Pinene        | 0.9                      | 0.8                 | -                              | -                      | 1                          | 4.3                           |
| $\delta$ -Decalactone   | 0.7                      | -                   | 1.3                            | 4                      | -                          | -                             |
| Triethyl Citrate        | -                        | -                   | -                              | -                      | 3.5                        | -                             |
| Phenethyl alcohol       | 2.5                      | 3                   | -                              | -                      | 3.17                       | 3.53                          |
| Methyl cinnamate        | -                        | -                   | -                              | -                      | 3.2                        | -                             |
| Thymol                  | 4.1                      | 4.5                 | 1.6                            | -                      | 3.13                       | 3.03                          |
| $\beta$ -Myrcene        | 4.4                      | -                   | -                              | -                      | -                          | 3                             |
| $\delta$ -Dodecalactone | 2.1                      | -                   | -                              | -                      | -                          | -                             |
| $\gamma$ -Undecalactone | -                        | -                   | -                              | -                      | 2.1                        | -                             |
| Ethyl Cinnamate         | -                        | -                   | -                              | -                      | -                          | 1.9                           |
| Ethyl 2-methylbutanoate | -                        | -                   | -                              | -                      | 1                          | 1.95                          |
| Isobutyl Acetate        | -                        | -                   | -                              | -                      | 1.93                       | -                             |
| 2-Acetylpyrrole         | -                        | -                   | -                              | -                      | 1.7                        | -                             |
| $\gamma$ -Decalactone   | -                        | -                   | -                              | -                      | 1.67                       | -                             |
| $\alpha$ -Caryophyllene | -                        | -                   | -                              | -                      | -                          | 1.65                          |
| p-Cymene                | 1.5                      | -                   | -                              | -                      | -                          | 1.63                          |
| Piperonal               | -                        | -                   | -                              | 1.5                    | -                          | -                             |
| Fenchol                 | -                        | -                   | -                              | -                      | -                          | 1.4                           |

|                     |     |     |     |   |      |      |
|---------------------|-----|-----|-----|---|------|------|
| Isopentyl Alcohol   | -   | 3.5 | -   | - | 1.13 | -    |
| Isoamyl Acetate     | -   | -   | -   | - | -    | 1.05 |
| Ethyl Isovalerate   | -   | -   | -   | - | -    | 1    |
| 2-Hexen-1-ol, (E)-  | -   | -   | -   | - | 0.97 | -    |
| $\gamma$ -Terpinene | 1.9 | 0.9 | 4.3 | - | 0.5  | 0.9  |
| 2,3,5,6-            |     |     |     |   |      |      |
| Tetramethylpyrazine | -   | -   | -   | - | -    | 0.9  |
| Benzaldehyde        | 1   | 1.3 | -   | - | -    | 0.6  |

Note: Concentrations of flavor chemicals are an average of 3 - 5 different pods

<sup>a</sup>= "Cool Mint" purchased in 2018

<sup>b</sup>= "Mint" purchased in 2019

<sup>c</sup>= "Classic Menthol" purchased in 2018

<sup>d</sup>= "Menthol" purchased in 2019

<sup>e</sup>= "Menthol" is a Puff Bar variant

<sup>f</sup>= "Cool Mint" is a Puff Plus variant
